# Supplementary material
Source: publisher figshare collection journal article supplement (https://osapublishing.figshare.com/ndownloader/files/28374510)
Supplement: Supplementary file 1 [file 28374510]

## Surface plasmon enhanced THz emission with nanoporous gold supported CdTe: supplement

**LUYI HUANG,<sup>1</sup> LING ZHANG,<sup>1,5</sup> JUNJIE ZHOU,<sup>1</sup> MIN LI,<sup>1</sup> CHUANG LI,<sup>2</sup> CHUANQI LI,<sup>2</sup> JINGQUAN ZHANG,<sup>2,6</sup> SHENGHAO WANG,<sup>3</sup> AND HEPING ZENG<sup>1,4</sup>**

<sup>1</sup>*School of Optical-Electrical and Computer Engineering, University of Shanghai for Science and Technology, Shanghai 200093, China*

<sup>2</sup>*College of Materials Science and Engineering, Sichuan University, Chengdu 610065, China*

<sup>3</sup>*Materials Genome Institute, Shanghai University, Shanghai 200444, China*

<sup>4</sup>*State key laboratory of Precision Spectroscopy, East China Normal University, Shanghai 200062, China*

<sup>5</sup>*lzhang@usst.edu.cn*

<sup>6</sup>*zhangjq@scu.edu.cn*

---

This supplement published with The Optical Society on 10 June 2021 by The Authors under the terms of the [Creative Commons Attribution 4.0 License](#) in the format provided by the authors and unedited. Further distribution of this work must maintain attribution to the author(s) and the published article's title, journal citation, and DOI.

Supplement DOI: <https://doi.org/10.6084/m9.figshare.14686473>

Parent Article DOI: <https://doi.org/10.1364/OE.424230>

## Supplemental Document

### Surface Plasmon Enhanced THz Emission with Nanoporous Gold Supported CdTe

LUYI HUANG,<sup>1</sup> LING ZHANG,<sup>1,5</sup> JUNJIE ZHOU,<sup>1</sup> MIN LI,<sup>1</sup> CHUANG LI,<sup>2</sup> CHUANQI LI,<sup>2</sup> JINGQUAN ZHANG,<sup>2,6</sup> SHENGHAO WANG<sup>3</sup> and HEPING ZENG<sup>1,4</sup>

<sup>1</sup>*School of Optical-Electrical and Computer Engineering, University of Shanghai for Science and Technology, Shanghai 200093, China*

<sup>2</sup>*College of Materials Science and Engineering, Sichuan University, Chengdu 610065, China*

<sup>3</sup>*Materials Genome Institute, Shanghai University, Shanghai 200444, China*

<sup>4</sup>*State key laboratory of Precision Spectroscopy, East China Normal University, Shanghai 200062, China*

<sup>5</sup>*lzhang@usst.edu.cn*

<sup>6</sup>*zhangjq@scu.edu.cn*

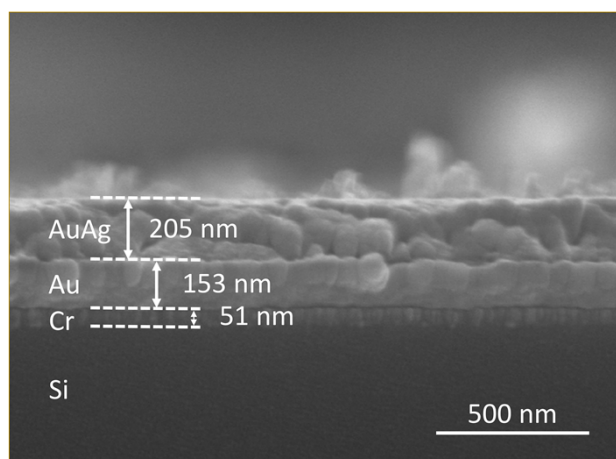

Fig. S1 SEM image of the cross section of sputtered Au<sub>25</sub>Ag<sub>75</sub> (wt. %) alloy film.

The Au<sub>25</sub>Ag<sub>75</sub> (wt. %) alloy film consists of three layers. On the silicon substrate, there are a Cr layer with the thickness of 51nm, an Au layer with the thickness of 153 nm and an AuAg alloy layer with the thickness of 205 nm.

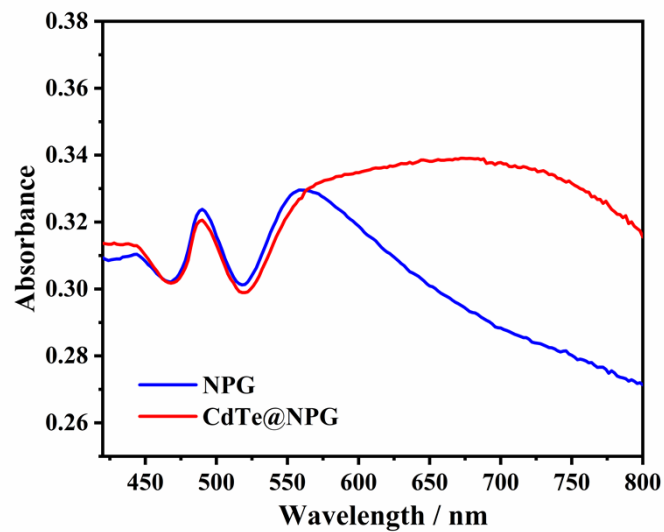

Fig. S2 Absorption spectra of NPG film and CdTe@NPG film.

Typical UV-Vis back-scattering spectra of NPG film and Cd@NPG film are presented in Fig. S2. Both the spectra shows two peaks, the lower peaks located around 500 nm represents the absorbance of Au, and the higher peaks which represents the localized surface plasmon resonance absorbance from CdTe@ NPG redshift and broaden compared to NPG.
